# Supplementary material for: Epigenetic Dysregulation of the Homeobox A5 (HOXA5) Gene Associates with Subcutaneous Adipocyte Hypertrophy in Human Obesity
Source: MDPI journal article supplement (doi:10.3390/cells11040728), 2022-02-18
Supplement: s1 [file s1]

**Supplementary Table S1.** List of primers used in this study.

| <i>GENE</i>                       | <i>Forward/Reverse</i>           | <i>Primer (5' to 3')</i>                                      |
|-----------------------------------|----------------------------------|---------------------------------------------------------------|
| <i>HOXA5</i><br><i>Bisulphite</i> | <i>Forward</i><br><i>Reverse</i> | TTTTGTATAATTTATGATGAATTATGGAAA<br>ACAAAAATAAAAAAAAAACTACAAAAC |
| <i>HOXA5</i><br><i>mRNA</i>       | <i>Forward</i><br><i>Reverse</i> | GCGCAAGCTGCACATAAG<br>CGGTTGAAGTGGAACCTCTT                    |
| <i>GLUT4</i><br><i>mRNA</i>       | <i>Forward</i><br><i>Reverse</i> | TCTGGCATCAATGCTGTTTTCTAT<br>ACCAACAACACCGAGACCAAG             |
| <i>FABP4</i><br><i>mRNA</i>       | <i>Forward</i><br><i>Reverse</i> | GACAGGAAAGTCAAGAGCACCATA<br>GACGCATTCCACCACCAGTT              |
| <i>RPL13A</i><br><i>mRNA</i>      | <i>Forward</i><br><i>Reverse</i> | CTTTCCGCTCGGCTGTTTTTC<br>GCCTTACGTCTGCGGATCTT                 |
| <i>ADIPONECTIN</i><br><i>mRNA</i> | <i>Forward</i><br><i>Reverse</i> | CCGGGCCATAATGGGG<br>CCCTTAGGACCAATAAGACCTGG                   |
| <i>WNT2B</i><br><i>mRNA</i>       | <i>Forward</i><br><i>Reverse</i> | CGAGAGTGTCAGCACCAATTC<br>AAGCTGCCTCTCGGCTACT                  |
| <i>FZD8</i><br><i>mRNA</i>        | <i>Forward</i><br><i>Reverse</i> | CACCGTCTCCACCTTCCTTA<br>GACACGAAGAGGTAGCAGGC                  |
| <i>CSNK2A1</i><br><i>mRNA</i>     | <i>Forward</i><br><i>Reverse</i> | GAACGCTTTGTCCACAGTGA<br>TATCGCAGCAGTTTGTCCAG                  |
| <i>NFATC1</i><br><i>mRNA</i>      | <i>Forward</i><br><i>Reverse</i> | CACCGCATCACAGGGAAGAC<br>GCACAGTCAATGACGGCTC                   |
| <i>ROHA</i><br><i>mRNA</i>        | <i>Forward</i><br><i>Reverse</i> | AGCCTGTGGAAAGACATGCTT<br>TCAAACACTGTGGGCACATAC                |
| <i>FOSL1</i><br><i>mRNA</i>       | <i>Forward</i><br><i>Reverse</i> | CAGTGGATGGTACAGCCTCA<br>CAGTTTGTGAGTCTCCTGTTTCA               |
| <i>GATA2</i><br><i>mRNA</i>       | <i>Forward</i><br><i>Reverse</i> | CAGCAAGGCTCGTTCTCTGTTCA<br>ATGAGTGGTCGGTTCTGCCCCAT            |
| <i>GATA3</i><br><i>mRNA</i>       | <i>Forward</i><br><i>Reverse</i> | TCATTAAGCCCAAGCGAAGG<br>GTCCCCATTGGCATTCTCTC                  |
| <i>FAS</i><br><i>mRNA</i>         | <i>Forward</i><br><i>Reverse</i> | ACCCTTGACCAAATGTGAAC<br>AAGAAGACAAAGCCACCCCA                  |
| <i>HOXA5</i><br><i>Cloning</i>    | <i>Forward</i><br><i>Reverse</i> | CGCCCTAGGGTCTATAGCACCTTGCACA<br>CGCGGATCCGCTGCAAAACGGGGGAA    |

**Supplementary Figure S1**

**HOXA5 silencing during *in vitro* adipogenesis of human SAT preadipocytes.** HOXA5 protein levels were measured by western blot analysis at different time points during differentiation in cells treated with HOXA5-specific siRNA, Scramble siRNA (SCR) or the control (CTRL). Vinculin served as a loading control. The upper figure shows representative blots; the lower figure presents the results quantification, where the black dotted line represents control un-transfected cells. The results are the mean  $\pm$  SD of three independent experiments. The statistical significance was tested by one-way ANOVA followed by Tukey's multi-comparison test at each indicated time point: \* $p < 0.05$ , \*\* $p < 0.01$ , \*\*\* $p < 0.001$  for comparison *versus* CTRL; ## $p < 0.01$ , ### $p < 0.001$  *versus* SCR.

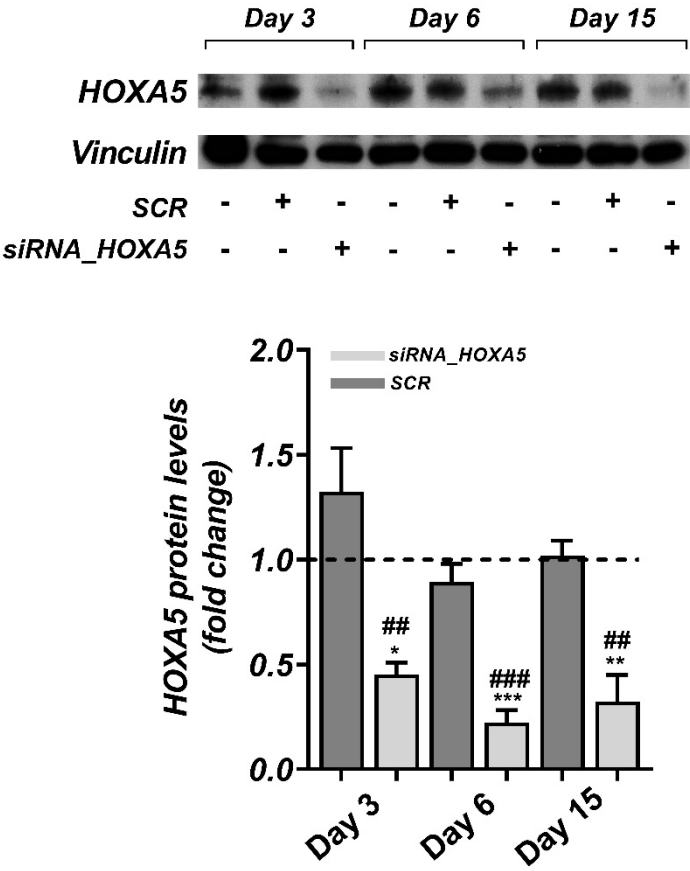

Supplementary Figure S2

**The effect of *HOXA5* silencing on the expression of preadipocyte and apoptosis markers.** The expression levels of *GATA2*, *GATA3* and *FAS* were assessed by qPCR at different time points during differentiation in the cells treated with scramble (SCR) or *HOXA5*-specific siRNA (*siRNA\_HOXA5*). All data are presented as means  $\pm$  SD of 3 independent experiments. Statistical significance was tested by one-way ANOVA followed by Tukey's multi-comparison test at each indicated time. \* $p < 0.05$  versus SCR. N.S., no significant difference.

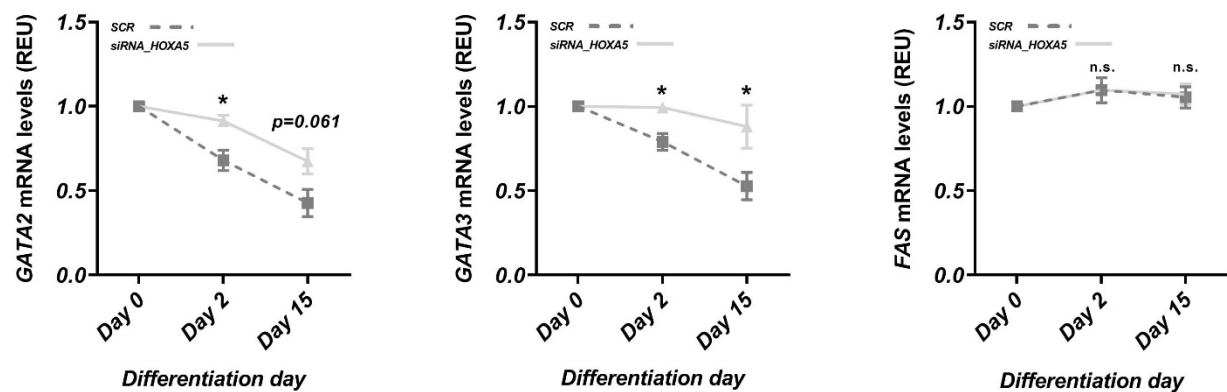

**Supplementary Table S2.** Clinical characteristics of FDR and CTRL subjects.

| <i>Measure</i>                     | <i>FDR</i>     | <i>CTRL</i> |
|------------------------------------|----------------|-------------|
| <i>N (female/male)</i>             | 12 (6/6)       | 12 (6/6)    |
| <i>Age, years</i>                  | 42.3 ± 2.9     | 38.7 ± 2.3  |
| <i>BMI, Kg/m<sup>2</sup></i>       | 25.4 ± 0.5     | 24.5 ± 0.7  |
| <i>Fat percent, %</i>              | 26.9 ± 2.4     | 24.0 ± 1.9  |
| <i>Waist to Hip Ratio (WHR)</i>    | 0.90 ± 0.02**  | 0.81 ± 0.02 |
| <i>Total triglycerides, mmol/L</i> | 1.5 ± 0.6**    | 0.8 ± 0.2   |
| <i>HDL cholesterol, mmol/L</i>     | 1.3 ± 0.2*     | 1.6 ± 0.3   |
| <i>Cell size, μm</i>               | 100.2 ± 1.7*** | 89.4 ± 1.9  |
| <i>GIR/bw, mg/Kg/min</i>           | 7.9 ± 0.6**    | 11.5 ± 0.8  |
| <i>f-insulin, pmol/L</i>           | 60.1 ± 8.0**   | 35.4 ± 3.9  |
| <i>fb-glucose, mmol/L</i>          | 4.8 ± 0.1**    | 4.4 ± 0.1   |
| <i>OGTT p-glucose 2h, mmol/L</i>   | 6.6 ± 0.6*     | 4.8 ± 0.4   |
| <i>HOMA-IR index</i>               | 2.0 ± 0.8***   | 1.1 ± 0.4   |

**Clinical characteristics of FDR and CTRL subjects.** The study group has been described under Materials and Methods. All data are expressed as means ± SD. Statistical significance was tested by a two-tailed Mann-Whitney U-test: \* $p < 0.05$ , \*\* $p < 0.01$ , \*\*\* $p < 0.001$ , FDR *vs.* CTRL. BMI, body mass index; GIR/bw, glucose infusion rate/body weight; OGTT, oral glucose tolerance test; HDL, high density lipoprotein; HOMA-IR, Homeostatic Model Assessment of Insulin Resistance.

Supplementary Figure S3

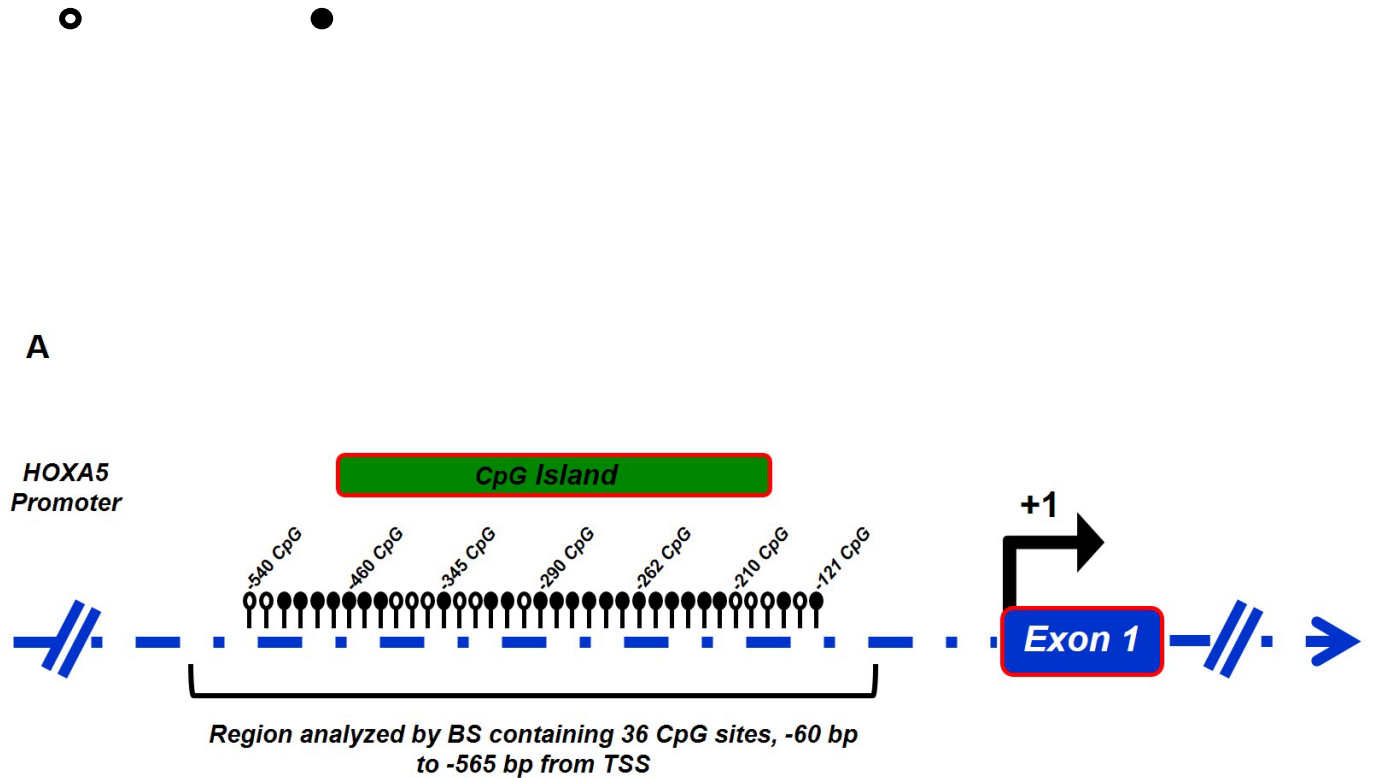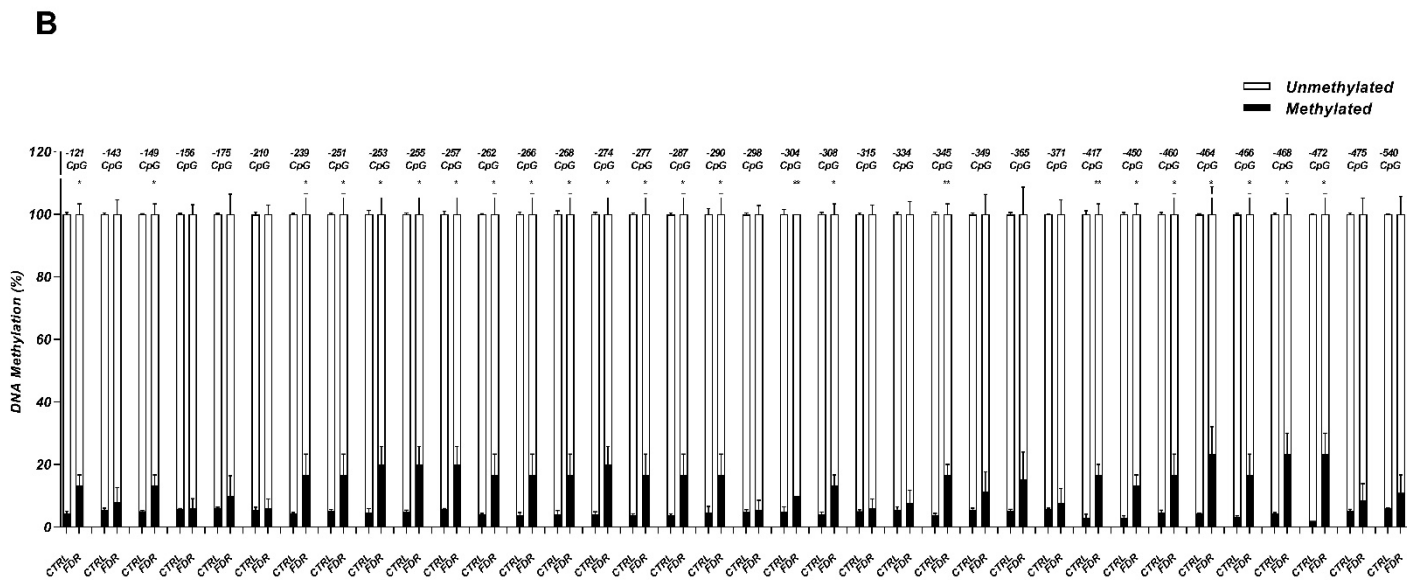

Supplementary Figure S4

**The correlation between *HOXA5* DNA methylation and its mRNA levels.** The correlation between *HOXA5* DNA methylation and *its* mRNA levels in preadipocytes from FDR (n=9) and CTRL (n=9) subjects available from the study group. The r correlation coefficient and p-value are indicated in the graph.

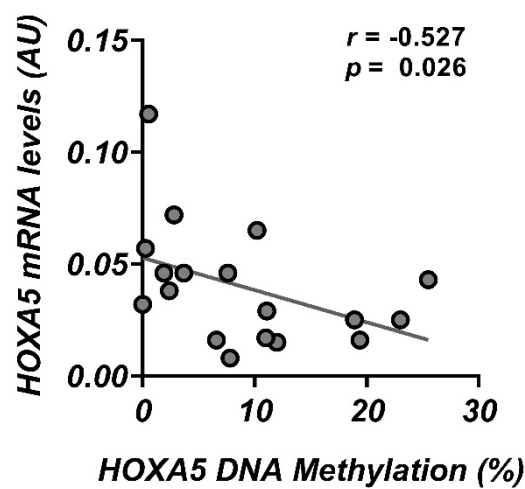

**Supplementary Figure S5**

**Validation of the WNT-Signalling Pathway array results between the HOXA5-silenced and scrambled cells.**

The 11 differentially expressed genes, identified by the RT2 Profiler™ PCR array, were individually analysed by qPCR in the same samples also tested in the PCR array (n = 3 per group/condition; please also refer to Figure 3 of the main text). Five of the 11 differentially expressed genes were not confirmed by qPCR assay. All the data are expressed as means  $\pm$  SD. N.S., no significant difference.

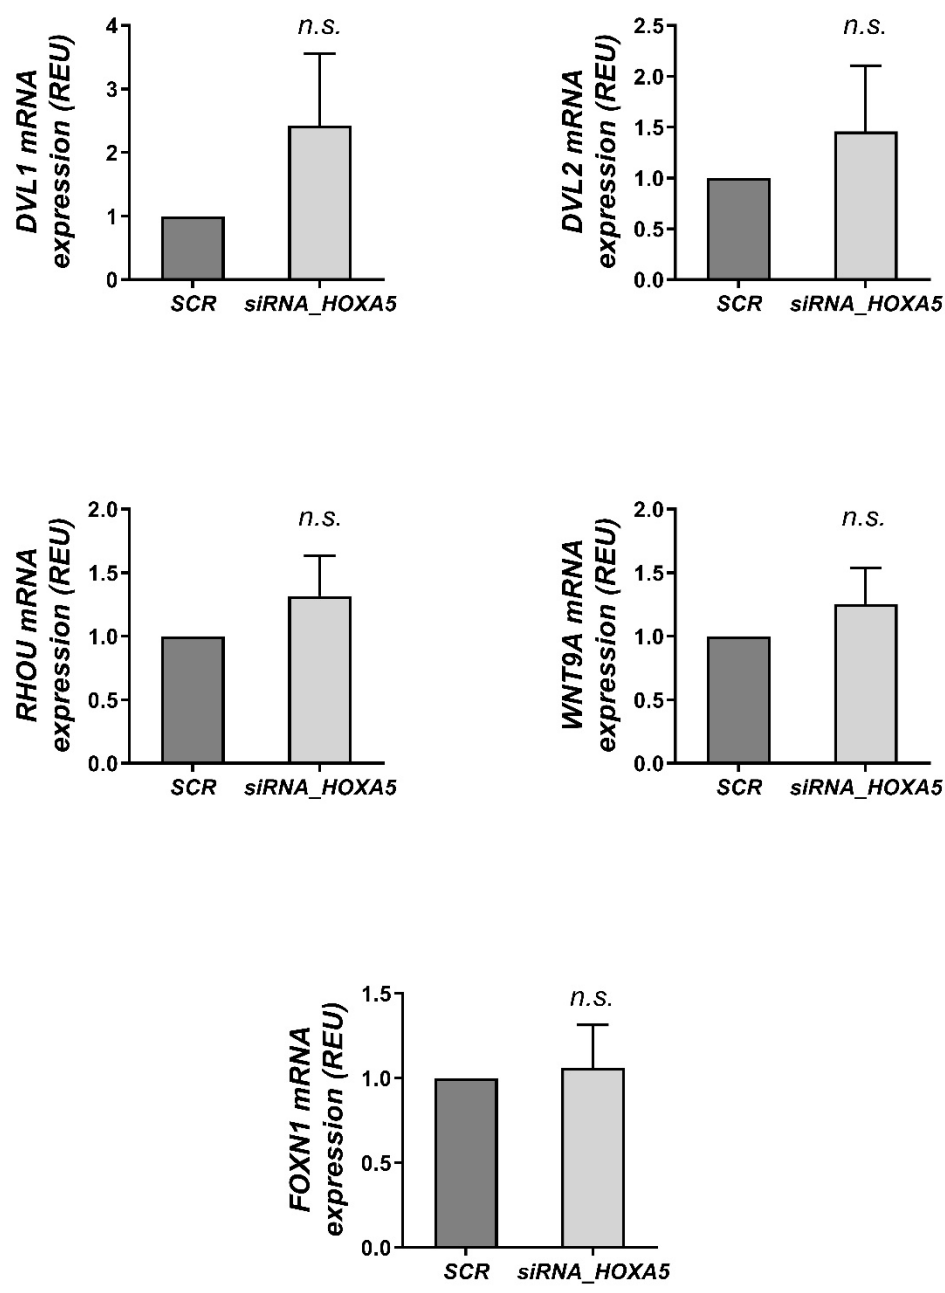

**Supplementary Figure S6**

**The effect of *HOXA5* silencing on the protein levels of WNT-Signalling factors.** The *HOXA5*, *WNT2B* and *NFATC1* protein levels were measured by western blot analysis in preadipocytes treated with *HOXA5*-specific siRNA (*siRNA\_HOXA5*), Scramble siRNA (SCR) and in control un-transfected cells. Vinculin served as a loading control. The upper figure shows representative blots; the lower figure presents the results quantification, where the black dotted line represents control un-transfected cells. The results are the mean  $\pm$  SD of three independent experiments. The statistical significance was tested by one-way ANOVA followed by Tukey's multi-comparison test: \* $p < 0.05$  and \*\* $p < 0.01$  versus control un-transfected cells; # $p < 0.05$  and ## $p < 0.01$  versus SCR.

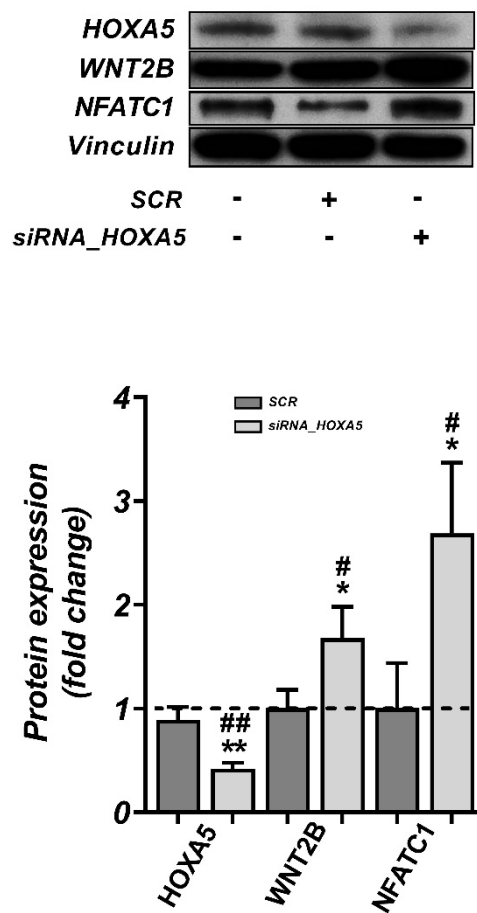



## Supplementary Figure S7

*In silico* identification of putative *HOXA5* binding sites across the promoter regions of *NFATC1* and *WNT2B* genes. The promoter region of both the *NFATC1* and *WNT2B* genes (1500 bp upstream the transcription start site; TSS) was analyzed in the *Genomatrix Database* (<https://www.genomatrix.de/>) using the *MatInspector* platform. One putative *HOXA5* binding motif was identified in the *NFATC1* promoter at -957 bp upstream the TSS one further motif in the *WNT2B* promoter at -171 bp upstream the TSS.

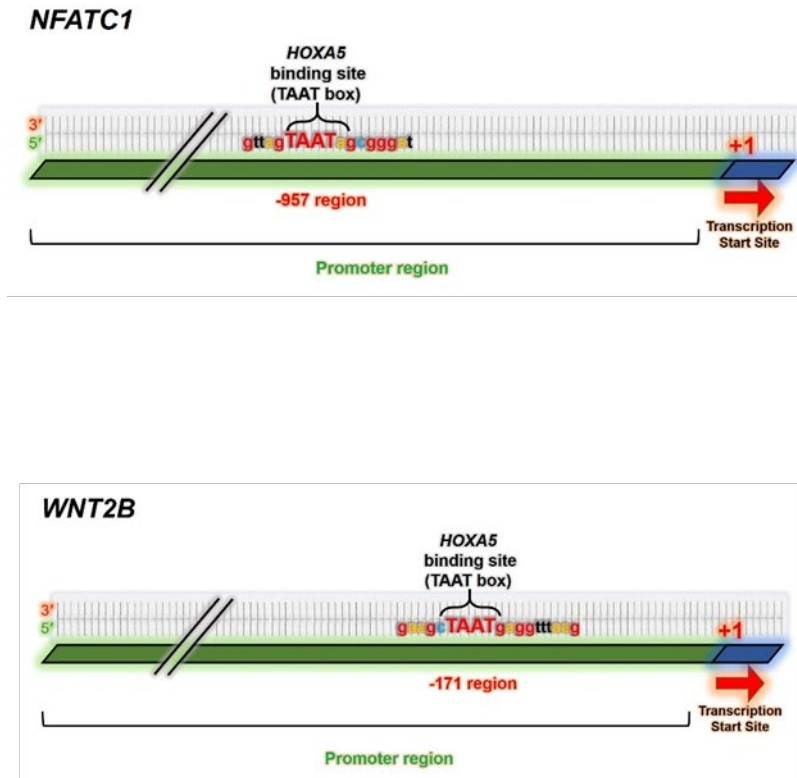

Supplementary Figure S8

***HOXA5* levels in whole abdominal SAT and in isolated SAT adipocytes from obese individuals.** Normalized mRNA expression of *HOXA5* in human abdominal SAT (a) and isolated SAT adipocytes (b) from obese and lean individuals. The data were obtained from large-scale human obesity expression datasets published in Gene Expression Omnibus (GEO). GEO accession number: GSE27951, (a), and GEO: GSE2508, (b). \* $p < 0.05$ , \*\* $p < 0.01$  in a two-tailed Mann–Whitney U-test.

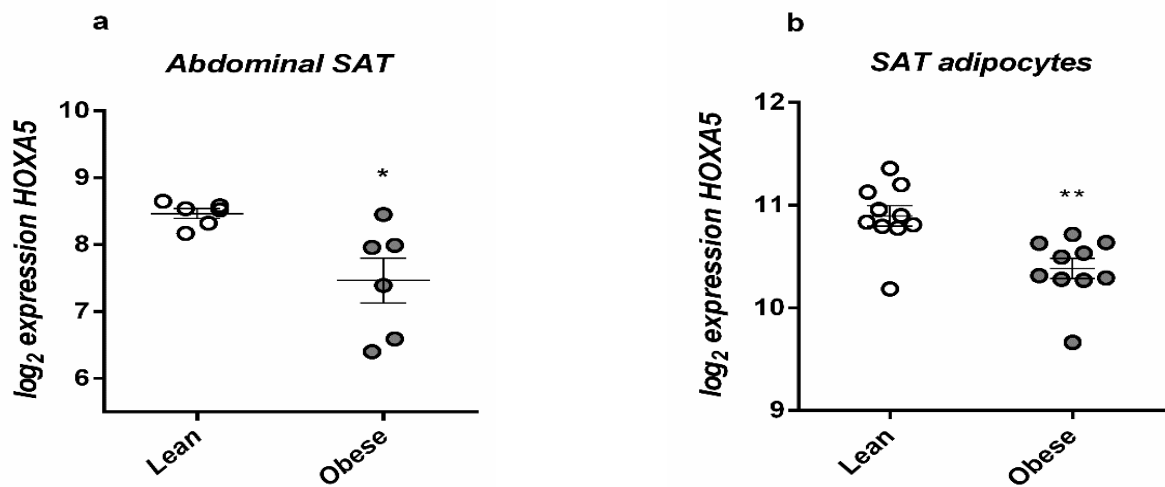

Supplementary Figure S9

Correlation between *NFATC1* and *WNT2B* expression and *HOXA5* expression in isolated SAT adipocytes from obese individuals. The data were obtained from large-scale human obesity expression datasets published in Gene Expression Omnibus (GEO). GEO accession number: GSE2508. The *r* correlation coefficients and *p*-values are indicated in the graph.

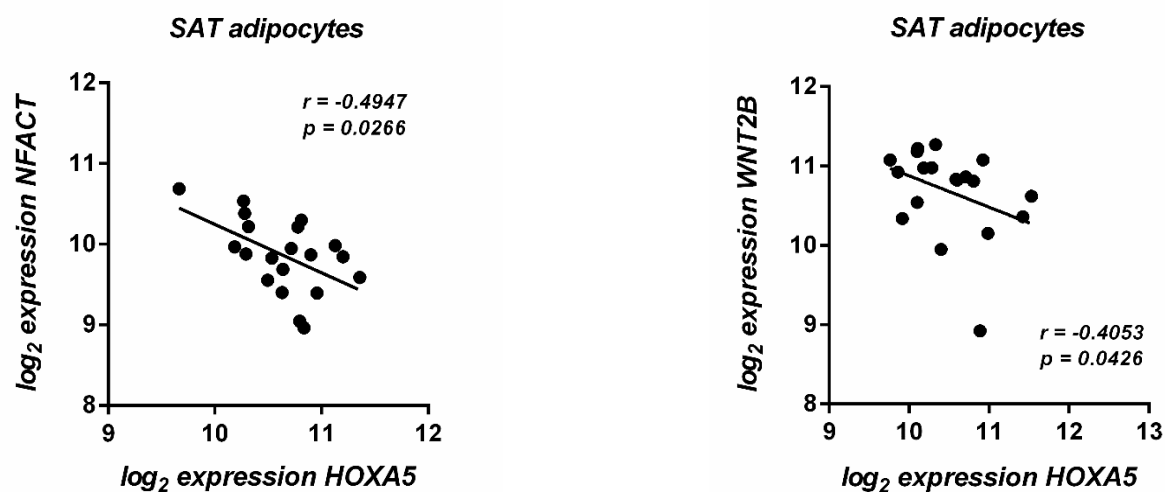

**Supplementary Table S3.** Clinical characteristics of Obese and Lean subjects.

| <i>Measure</i>                     | <i>Obese</i>  | <i>Lean</i> |
|------------------------------------|---------------|-------------|
| <i>N (female/male)</i>             | 8 (4/4)       | 8 (4/4)     |
| <i>Age, years</i>                  | 36.2 ± 5.3*   | 31.3 ± 2.1  |
| <i>BMI, Kg/m<sup>2</sup></i>       | 43.0 ± 6.9*** | 22.2 ± 2.9  |
| <i>Total triglycerides, mmol/L</i> | 1.6 ± 0.6***  | 0.7 ± 0.2   |
| <i>HDL cholesterol, mmol/L</i>     | 1.3 ± 0.3*    | 1.8 ± 0.5   |
| <i>fb-glucose, mmol/L</i>          | 4.7 ± 0.3     | 4.9 ± 0.4   |

Clinical characteristics of Obese and Lean subjects. All data are expressed as means ± SD. Statistical significance was tested by a two-tailed Mann-Whitney U-test: \* $p < 0.05$ , \*\*\* $p < 0.001$ , Obese *vs.* Lean. BMI, body mass index; HDL, high density lipoprotein.
